# Supplementary material for: Synthesis, characterization, and photoinduced electron transfer properties of core-functionalized perylene-3,4:9,10-bis(dicarboximide)s with pendant anthracenes
Source: Royal Society of Chemistry journal article supplement (doi:10.1039/c1jm13397g), 2011-01-01
Supplement: c1jm13397g.pdf [file c1jm13397g.pdf]

## Supporting Information

# Synthesis, Characterization, and Photoinduced Electron Transfer Properties of Core-Functionalized Perylene-3,4;9,10-bis(dicarboximide)s with Pendant Anthracenes

Shinji Ando, Charusheela Ramanan, Antonio Facchetti\*, Michael R. Wasielewski\*, and Tobin J. Marks\*

Received (in XXX, XXX) Xth XXXXXXXXX 200X, Accepted Xth XXXXXXXXX 200X

First published on the web Xth XXXXXXXXX 200X

DOI: 10.1039/b000000x

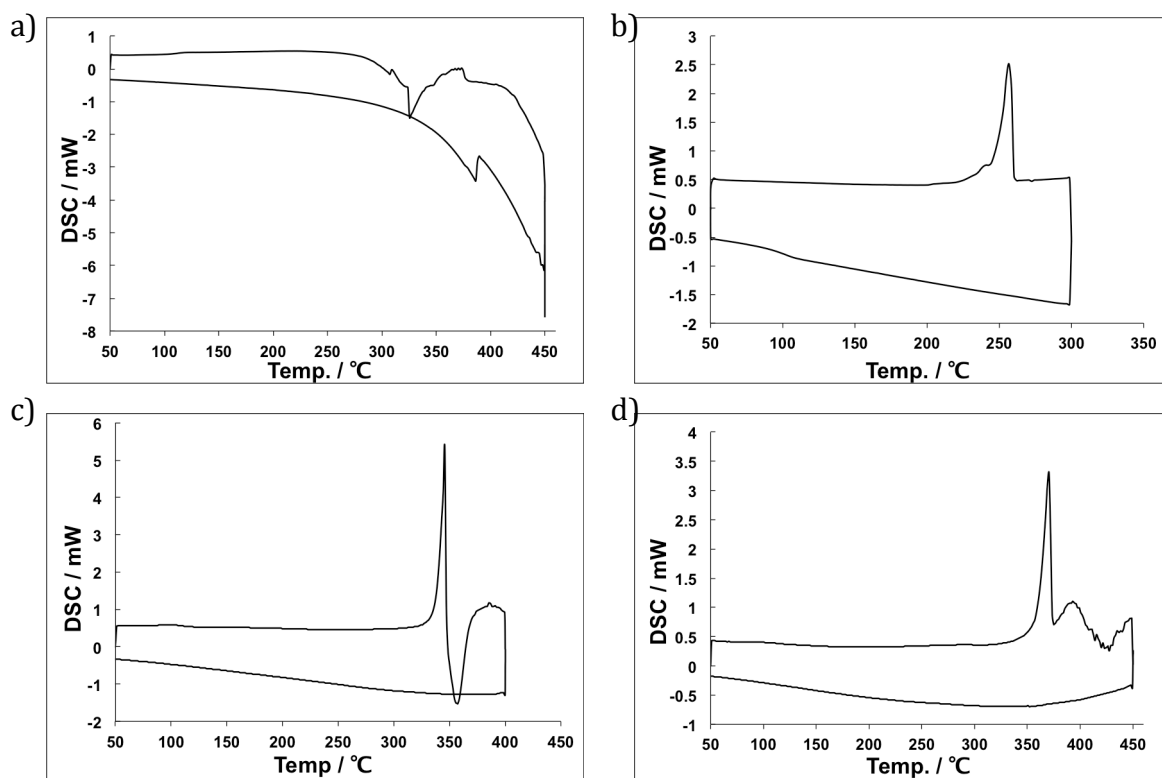

**Figure S1.** Differential scanning calorimetry plots for: a) **PDI8A-Br<sub>2</sub>**, b) **PDI8A-CN<sub>2</sub>**, c) **PDI3A8-Br<sub>2</sub>**, and d) **PDI3A8-CN<sub>2</sub>**

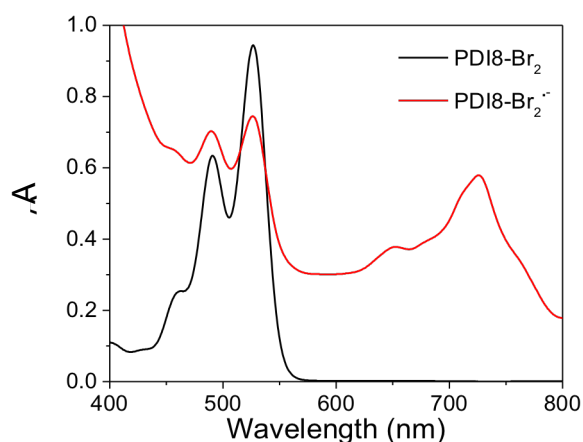

**Figure S2.** Absorption spectrum of PDI8-Br<sub>2</sub> (black) and PDI8-Br<sub>2</sub><sup>•-</sup> (red) measured after chemical reduction by cobaltacene.

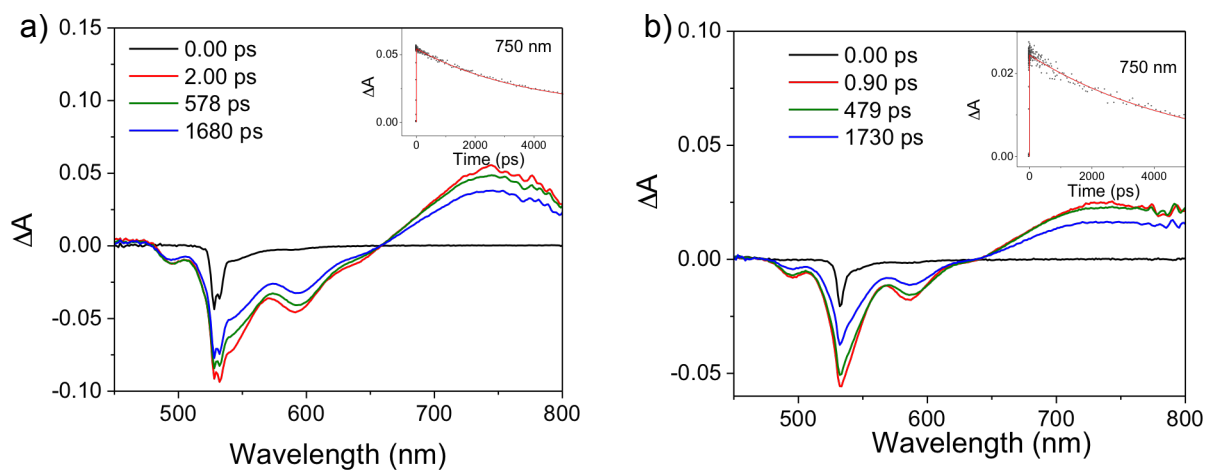

**Figure S3.** Transient absorption spectra of: a) PDI8-Br<sub>2</sub> and b) PDI8-CN<sub>2</sub> measured in toluene following excitation with 532 nm laser pulse. Inset: transient absorption kinetics at indicated wavelength.
